# Supplementary material
Source: publisher site journal article supplement (https://www.dovepress.com/article/342457)
Supplement: Supplementary file 1 [file get_supplementary_file.php]

**Supplement: Assessment of uni-dimensionality for each measure**

# The unidimensionality assumption which is necessary for the IRT approach was assessed by parallel analysis (Humphreys and Montanelli, 1975; Dinno, 2009) to infer the number of factors. In parallel analysis factors are chosen with eigenvalues greater than would be expected to arise by chance rather the typical criteria of choosing factors with eigenvalues greater than one. Specifically, principal component eigenvalues from the real dataset are compared to the median of eigenvalues from simulated datasets with randomly generated data with the same number of observations and items as the real data. In the simulated datasets correlations between all items are expected to be zero. If the real data eigenvalue for a given principal component exceeds the median of the simulated data eigenvalues then then the eigenvalue is considered to be larger than would be expected by chance. A total of 5000 simulated datasets were generated and the dimensionality was defined as the number of principal components whose real data eigenvalues exceed the median of the simulated data eigenvalues.

For the QIDS-C, QIDS-SR, VQIDS-C, VQIDS-SR, and HAMD-6, , the first real data eigenvalue was much larger than the median of the first simulated data eigenvalues, while the second real data eigenvalue was smaller than the second simulated data eigenvalue (Table S1). Therefore, each of these measures was determined to be unidimensional. For the HAMD-17 and IDS-C30 the real and median of the simulated eigenvalues for the first four principal components are shown in Table S2 where it can be seen that for each of these measures has first 3 real data eigenvalues are larger than the median of the corresponding simulated data eigenvalues. Thus, each of these measures has 3 factors.

Table S1: Eigenvalues from Real and Simulated Datasets: QIDS, VQIDS, HAMD6

| Measurement | First Real Data Eigenvalue | First Simulated Data Eigenvalue* | Second Real Data Eigenvalue | Second Simulated Data Eigenvalue* |
| --- | --- | --- | --- | --- |
| VQIDS-C | 3.204 | 1.056 | 0.620 | 1.024 |
| VQIDS-SR | 3.206 | 1.056 | 0.566 | 1.024 |
| QIDS-C | 4.553 | 1.093 | 0.912 | 1.063 |
| QIDS-SR | 4.496 | 1.094 | 0.940 | 1.063 |
| HAMD-6 | 3.553 | 1.067 | 0.746 | 1.036 |

*Median eigenvalue from 5000 simulated datasets

Table S2: Eigenvalues from Real and Simulated Datasets: HAMD-17 and IDS-C30

| Principal Component | HAMD-17  Real Data  Eigenvalue | HAMD-17  Simulated Data Eigenvalue* | IDS-C30  Real Data Eigenvalue | IDS-C30  Simulated Data Eigenvalue* |
| --- | --- | --- | --- | --- |
| 1 | 6.050 | 1.147 | 9.788 | 1.203 |
| 2 | 1.241 | 1.119 | 1.500 | 1.176 |
| 3 | 1.151 | 1.097 | 1.235 | 1.155 |
| 4 | 1.074 | 1.078 | 1.126 | 1.137 |

*Median eigenvalue from 5000 simulated datasets

**References**

Humphreys, L.G., Montanelli, R.G. Jr., 1975. An investigation of the parallel analysis criterion for determining the number of common factors. Multivariate Behav. Res. 10, 193-206.

Dinno A. Implementing Horn’s parallel analysis for principal component analysis and factor analysis. *The Stata Journal*. 2009;9(2):291-298. doi:10.1177/1536867X0900900207.
